# Supplementary material
Source: MDPI journal article supplement (https://www.mdpi.com/2504-3110/7/10/721)
Supplement: s1 [file s1]

# Fractal Derivatives and Singularity Analysis of Frequency–Depth Clusters of Earthquakes along Converging Plate Boundaries

Table S1. Statistics of earthquakes around the Moho in 130 datasets from the study areas.

| Location of profiles in tectonic zones | Profiles | Area (km <sup>2</sup> ) | Number of Earthquakes | Average Magnitudes | Average depth (km) | Type of models | c-value | R <sup>2</sup> | t-value |
|----------------------------------------|----------|-------------------------|-----------------------|--------------------|--------------------|----------------|---------|----------------|---------|
| Tethys Belt                            | TB-01    | 173399                  | 802                   | 3.76               | 47                 | 2              | -15.42  | 0.999          | 63.21   |
| Tethys Belt                            | TB-02    | 169884                  | 756                   | 3.73               | 48                 | 2              | -14.68  | 0.997          | 36.46   |
| Tethys Belt                            | TB-03    | 175460                  | 756                   | 3.76               | 50                 | 2              | -12.73  | 0.997          | 36.46   |
| Tethys Belt                            | TB-04    | 182601                  | 767                   | 3.74               | 47                 | 2              | -16.85  | 0.989          | 18.96   |
| Tethys Belt                            | TB-05    | 165399                  | 740                   | 3.75               | 50                 | 2              | -11.52  | 0.999          | 63.21   |
| Tethys Belt                            | TB-06    | 153681                  | 243                   | 4.00               | 57                 | 2              | -1.74   | 0.993          | 23.82   |
| Tethys Belt                            | TB-07    | 151851                  | 146                   | 4.14               | 59                 | -              | -       | -              | -       |
| Tethys Belt                            | TB-08    | 148710                  | 57                    | 3.82               | 49                 | -              | -       | -              | -       |
| Tethys Belt                            | TB-09    | 135471                  | 14                    | 4.26               | 47                 | 2              | -0.33   | 0.998          | 44.68   |
| Tethys Belt                            | TB-10    | 136550                  | 7                     | 4.39               | 41                 | 2              | -0.18   | 0.990          | 19.90   |
| Tethys Belt                            | TB-11    | 144507                  | 2                     | 3.90               | 38                 | -              | -       | -              | -       |
| Tethys Belt                            | TB-12    | 122183                  | 5                     | 4.26               | 39                 | 3              | -0.90   | 0.992          | 22.27   |
| Tethys Belt                            | TB-13    | 110155                  | 15                    | 4.33               | 47                 | 2              | -0.33   | 0.984          | 15.68   |
| Tethys Belt                            | TB-14    | 148229                  | 23                    | 4.38               | 49                 | 2              | -0.35   | 0.989          | 18.96   |
| Tethys Belt                            | TB-15    | 148382                  | 55                    | 4.63               | 46                 | 2              | -1.07   | 0.999          | 63.21   |
| Tethys Belt                            | TB-16    | 194820                  | 58                    | 4.40               | 49                 | 2              | -0.99   | 0.999          | 63.21   |
| Tethys Belt                            | TB-17    | 198833                  | 43                    | 4.59               | 54                 | 1              | -0.01   | 0.949          | 8.63    |
| Tethys Belt                            | TB-18    | 202264                  | 80                    | 4.73               | 51                 | 1              | -0.04   | 0.969          | 11.18   |
| Tethys Belt                            | TB-19    | 210052                  | 122                   | 4.64               | 50                 | 1              | -0.05   | 0.976          | 12.75   |
| Tethys Belt                            | TB-20    | 181488                  | 105                   | 4.53               | 49                 | 1              | -0.05   | 0.978          | 13.33   |
| Tethys Belt                            | TB-21    | 194345                  | 92                    | 4.58               | 46                 | 2              | -1.97   | 0.992          | 22.27   |
| Tethys Belt                            | TB-22    | 181286                  | 88                    | 4.35               | 50                 | 2              | -1.38   | 0.998          | 44.68   |
| Tethys Belt                            | TB-23    | 145177                  | 180                   | 4.58               | 51                 | 1              | -0.07   | 0.989          | 18.96   |
| Tethys Belt                            | TB-24    | 160791                  | 17                    | 5.17               | 64                 | -              | -       | -              | -       |
| Tethys Belt                            | TB-25    | 161000                  | 28                    | 4.65               | 52                 | 1              | -0.01   | 0.921          | 6.83    |
| Tethys Belt                            | TB-26    | 106323                  | 35                    | 4.59               | 42                 | 3              | -0.84   | 0.994          | 25.74   |
| Tethys Belt                            | TB-27    | 156012                  | 149                   | 4.35               | 51                 | 2              | -2.34   | 0.997          | 36.46   |
| Tethys Belt                            | TB-28    | 232839                  | 409                   | 4.37               | 60                 | 3              | -0.30   | 0.981          | 14.37   |
| Tethys Belt                            | TB-29    | 203655                  | 807                   | 4.32               | 67                 | -              | -       | -              | -       |
| Tethys Belt                            | TB-30    | 236939                  | 663                   | 4.35               | 52                 | 2              | -8.46   | 0.995          | 28.21   |
| Tethys Belt                            | TB-31    | 210228                  | 145                   | 4.17               | 54                 | 2              | -1.63   | 0.996          | 31.56   |
| Tethys Belt                            | TB-32    | 240497                  | 94                    | 4.37               | 47                 | 2              | -1.61   | 0.986          | 16.78   |
| Tethys Belt                            | TB-33    | 245988                  | 68                    | 4.43               | 47                 | 2              | -1.55   | 0.995          | 28.21   |
| Tethys Belt                            | TB-34    | 255335                  | 57                    | 4.36               | 50                 | 3              | -0.58   | 0.987          | 17.43   |
| Tethys Belt                            | TB-35    | 257653                  | 90                    | 4.39               | 50                 | 1              | -0.04   | 0.991          | 20.99   |
| Tethys Belt                            | TB-36    | 264873                  | 147                   | 4.33               | 50                 | 1              | -0.06   | 0.974          | 12.24   |
| Tethys Belt                            | TB-37    | 168820                  | 346                   | 4.52               | 66                 | -              | -       | -              | -       |
| Tethys Belt                            | TB-38    | 160958                  | 119                   | 4.58               | 64                 | -              | -       | -              | -       |

|               |       |        |      |      |    |   |        |       |       |
|---------------|-------|--------|------|------|----|---|--------|-------|-------|
| Tethys Belt   | TB-39 | 168674 | 63   | 4.60 | 61 | - | -      | -     | -     |
| Tethys Belt   | TB-40 | 169134 | 28   | 4.48 | 51 | 2 | -0.27  | 0.925 | 7.02  |
| Tethys Belt   | TB-41 | 152075 | 201  | 4.54 | 43 | 3 | -0.87  | 0.998 | 44.68 |
| Tethys Belt   | TB-42 | 155171 | 132  | 4.55 | 49 | 3 | -0.66  | 0.994 | 25.74 |
| Tethys Belt   | TB-43 | 151776 | 161  | 4.69 | 53 | 2 | -2.20  | 0.995 | 28.21 |
| Tethys Belt   | TB-44 | 141529 | 250  | 4.58 | 46 | 3 | -0.77  | 0.991 | 20.99 |
| Tethys Belt   | TB-45 | 142653 | 463  | 4.74 | 53 | 1 | -0.15  | 0.974 | 12.24 |
| Tethys Belt   | TB-46 | 142018 | 469  | 4.54 | 47 | 3 | -0.74  | 0.994 | 25.74 |
| Tethys Belt   | TB-47 | 141601 | 371  | 4.57 | 48 | 3 | -0.70  | 0.997 | 36.46 |
| Tethys Belt   | TB-48 | 149688 | 261  | 4.61 | 49 | 3 | -0.69  | 0.999 | 63.21 |
| Tethys Belt   | TB-49 | 147876 | 494  | 4.66 | 45 | 2 | -13.45 | 0.972 | 11.78 |
| Tethys Belt   | TB-50 | 150062 | 604  | 4.79 | 55 | 2 | -5.43  | 0.983 | 15.21 |
| Tethys Belt   | TB-51 | 124557 | 399  | 4.74 | 53 | 2 | -4.51  | 0.996 | 31.56 |
| Tethys Belt   | TB-52 | 119114 | 260  | 4.66 | 57 | 3 | -0.39  | 0.991 | 20.99 |
| Tethys Belt   | TB-53 | 132525 | 230  | 4.59 | 61 | 3 | -0.39  | 0.840 | 4.58  |
| Tethys Belt   | TB-54 | 135000 | 234  | 4.64 | 59 | 3 | -0.32  | 0.935 | 7.59  |
| Tethys Belt   | TB-55 | 136472 | 221  | 4.60 | 55 | 2 | -2.45  | 0.997 | 36.46 |
| Tethys Belt   | TB-56 | 136720 | 200  | 4.49 | 52 | 2 | -3.12  | 0.992 | 22.27 |
| Tethys Belt   | TB-57 | 135686 | 295  | 4.44 | 53 | 1 | -0.12  | 0.986 | 16.78 |
| West Pacific  | WP-20 | 173193 | 1143 | 4.71 | 59 | 2 | -9.51  | 0.997 | 36.46 |
| West Pacific  | WP-19 | 168671 | 1704 | 4.66 | 55 | 1 | -0.07  | 0.947 | 8.45  |
| West Pacific  | WP-18 | 164729 | 1111 | 4.69 | 61 | 1 | -0.11  | 0.738 | 3.36  |
| West Pacific  | WP-17 | 167143 | 884  | 4.78 | 58 | 1 | -0.16  | 0.985 | 16.21 |
| West Pacific  | WP-16 | 177806 | 539  | 4.67 | 53 | 1 | -0.36  | 0.953 | 9.01  |
| West Pacific  | WP-15 | 181260 | 173  | 4.64 | 47 | 1 | -0.19  | 0.983 | 15.21 |
| West Pacific  | WP-14 | 134368 | 272  | 4.63 | 53 | 2 | -12.68 | 0.985 | 16.21 |
| West Pacific  | WP-33 | 182414 | 206  | 4.49 | 53 | 2 | -47.60 | 0.999 | 63.21 |
| West Pacific  | WP-32 | 171557 | 227  | 4.48 | 51 | 3 | -0.61  | 0.996 | 31.56 |
| West Pacific  | WP-31 | 165553 | 419  | 4.56 | 49 | 2 | -3.67  | 0.993 | 23.82 |
| West Pacific  | WP-30 | 183418 | 321  | 4.60 | 48 | 2 | -2.06  | 0.994 | 25.74 |
| West Pacific  | WP-29 | 185608 | 33   | 4.46 | 45 | 3 | -0.65  | 0.994 | 25.74 |
| West Pacific  | WP-28 | 201492 | 78   | 4.33 | 46 | 1 | -0.10  | 0.988 | 18.15 |
| West Pacific  | WP-08 | 192028 | 3043 | 4.52 | 50 | 1 | -0.10  | 0.996 | 31.56 |
| West Pacific  | WP-07 | 234999 | 1335 | 4.61 | 54 | 2 | -3.85  | 0.996 | 31.56 |
| West Pacific  | WP-06 | 267035 | 565  | 4.61 | 55 | 2 | -6.99  | 0.999 | 63.21 |
| West Pacific  | WP-05 | 288408 | 978  | 4.80 | 52 | 2 | -4.63  | 0.983 | 15.21 |
| West Pacific  | WP-04 | 313646 | 676  | 4.60 | 56 | 3 | -0.24  | 0.862 | 5.00  |
| West Pacific  | WP-03 | 340505 | 596  | 4.77 | 55 | 3 | -0.44  | 0.993 | 23.82 |
| West Pacific  | WP-02 | 381376 | 408  | 4.74 | 58 | 3 | -0.27  | 0.949 | 8.63  |
| West Pacific  | WP-01 | 415782 | 656  | 4.67 | 51 | 2 | -2.63  | 0.998 | 44.68 |
| West Pacific  | WP-09 | 157683 | 292  | 4.54 | 51 | 3 | -0.61  | 0.996 | 31.56 |
| West Pacific  | WP-10 | 105845 | 153  | 4.51 | 48 | 3 | -0.70  | 0.990 | 19.90 |
| West Pacific  | WP-11 | 136550 | 126  | 4.63 | 52 | * | -      | -     | -     |
| West Pacific  | WP-12 | 118567 | 219  | 4.68 | 50 | * | -      | -     | -     |
| West Pacific  | WP-13 | 109526 | 478  | 4.66 | 56 | * | -      | -     | -     |
| West Pacific  | WP-21 | 105172 | 163  | 4.50 | 49 | 1 | -0.17  | 0.993 | 23.82 |
| West Pacific  | WP-22 | 101711 | 584  | 4.55 | 49 | 2 | -1.85  | 0.992 | 22.27 |
| West Pacific  | WP-23 | 100640 | 235  | 4.54 | 50 | 2 | -0.73  | 0.993 | 23.82 |
| West Pacific  | WP-24 | 100428 | 203  | 4.54 | 65 | 2 | -5.38  | 0.993 | 23.82 |
| West Pacific  | WP-25 | 94904  | 514  | 4.38 | 61 | 1 | -0.23  | 0.985 | 16.21 |
| West Pacific  | WP-26 | 92763  | 460  | 4.47 | 60 | 3 | -0.60  | 0.993 | 23.82 |
| West Pacific  | WP-27 | 102238 | 469  | 4.55 | 51 | 2 | -2.51  | 0.998 | 44.68 |
| North Pacific | NA-01 | 736435 | 821  | 4.26 | 54 | 1 | -0.18  | 0.872 | 5.22  |

|                    |       |        |      |      |    |   |        |       |       |
|--------------------|-------|--------|------|------|----|---|--------|-------|-------|
| North Pacific      | NA-02 | 703913 | 788  | 4.18 | 52 | 1 | -0.23  | 0.950 | 8.72  |
| North Pacific      | NA-03 | 687751 | 533  | 4.01 | 49 | 2 | -9.80  | 0.990 | 19.90 |
| North Pacific      | NA-04 | 665019 | 665  | 3.99 | 47 | 2 | -14.20 | 0.995 | 28.21 |
| North Pacific      | NA-05 | 699390 | 465  | 3.75 | 55 | 1 | -0.10  | 0.985 | 16.20 |
| North Pacific      | NA-06 | 728489 | 353  | 3.80 | 51 | 2 | -5.54  | 0.995 | 28.21 |
| North Pacific      | NA-07 | 755189 | 233  | 3.76 | 55 | 1 | -0.08  | 0.988 | 18.15 |
| North Pacific      | NA-08 | 745533 | 559  | 3.76 | 58 | 1 | -0.08  | 0.805 | 4.06  |
| North Pacific      | NA-09 | 737667 | 2229 | 3.55 | 62 | * | -      | -     | -     |
| North Pacific      | NA-10 | 721155 | 1232 | 3.55 | 52 | 2 | -17.30 | 0.997 | 36.46 |
| North Pacific      | NA-11 | 694979 | 24   | 3.83 | 44 | * | -      | -     | -     |
| North Pacific      | NA-12 | 706849 | 11   | 3.85 | 56 | * | -      | -     | -     |
| North Pacific      | NA-13 | 649333 | 8    | 3.49 | 47 | * | -      | -     | -     |
| North Pacific      | NA-14 | 526726 | 0    | 0.00 | 0  | * | -      | -     | -     |
| North Pacific      | NA-15 | 505011 | 0    | 0.00 | 0  | * | -      | -     | -     |
| North Pacific      | NA-16 | 455937 | 1    | 4.00 | 35 | * | -      | -     | -     |
| North Pacific      | NA-17 | 440137 | 11   | 3.80 | 39 | * | -      | -     | -     |
| North Pacific      | NA-18 | 319837 | 22   | 3.75 | 48 | * | -      | -     | -     |
| North Pacific      | NA-19 | 303463 | 55   | 3.58 | 39 | * | -      | -     | -     |
| North Pacific      | NA-20 | 115751 | 53   | 4.45 | 59 | * | -      | -     | -     |
| North Pacific      | NA-21 | 180162 | 632  | 4.11 | 54 | 1 | -0.15  | 0.914 | 6.52  |
| North Pacific      | NA-22 | 195351 | 542  | 4.17 | 59 | 1 | -0.07  | 0.894 | 5.81  |
| North Pacific      | NA-23 | 200952 | 1180 | 4.51 | 58 | 2 | -7.10  | 0.960 | 9.80  |
| North Pacific      | NA-24 | 181002 | 1077 | 4.51 | 59 | 1 | -0.12  | 0.829 | 4.40  |
| North Pacific      | NA-25 | 118276 | 207  | 4.55 | 54 | 2 | -2.15  | 0.989 | 18.96 |
| South East Pacific | SA-01 | 224885 | 158  | 4.45 | 59 | 1 | -0.03  | 0.972 | 11.78 |
| South East Pacific | SA-02 | 231853 | 72   | 4.57 | 51 | 1 | -0.03  | 0.987 | 17.43 |
| South East Pacific | SA-03 | 219063 | 189  | 4.70 | 57 | 3 | -0.37  | 0.997 | 36.46 |
| South East Pacific | SA-04 | 226408 | 186  | 4.52 | 51 | 2 | -2.58  | 0.988 | 18.15 |
| South East Pacific | SA-05 | 244839 | 166  | 4.76 | 56 | * | -      | -     | -     |
| South East Pacific | SA-06 | 238784 | 370  | 4.55 | 51 | 3 | -0.57  | 0.996 | 31.56 |
| South East Pacific | SA-07 | 238571 | 304  | 4.59 | 61 | 2 | -1.16  | 0.978 | 13.33 |
| South East Pacific | SA-08 | 264125 | 432  | 4.50 | 58 | 3 | -0.42  | 0.992 | 22.27 |
| South East Pacific | SA-09 | 299405 | 432  | 4.56 | 62 | 3 | -0.37  | 0.917 | 6.65  |
| South East Pacific | SA-10 | 304873 | 538  | 4.25 | 57 | 2 | -5.08  | 0.987 | 17.43 |
| South East Pacific | SA-11 | 305142 | 2335 | 3.88 | 54 | 2 | -26.9  | 0.996 | 31.56 |
| South East Pacific | SA-12 | 302631 | 2168 | 3.85 | 52 | 3 | -0.61  | 0.997 | 36.46 |
| South East Pacific | SA-13 | 307743 | 679  | 4.35 | 47 | 3 | -0.83  | 0.999 | 63.21 |
| South East Pacific | SA-14 | 317073 | 253  | 4.60 | 40 | 3 | -0.96  | 1.000 | -     |

Note: \* and - stand for no data; model types 1 – linear, 2 log-linear, and 3 log-log linear.

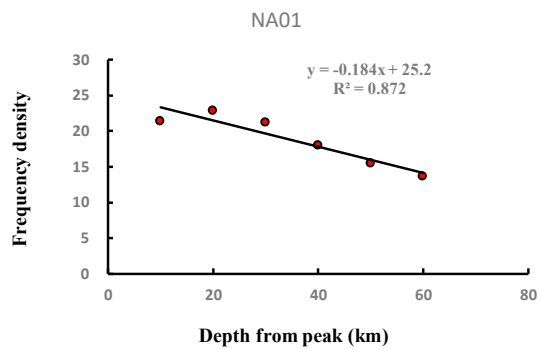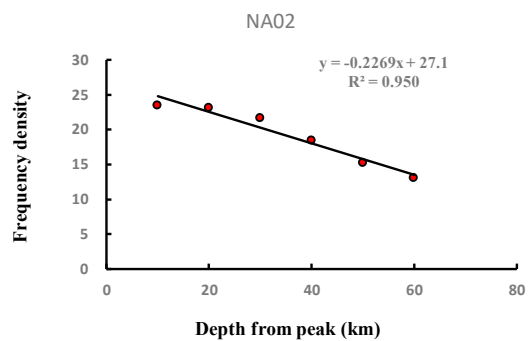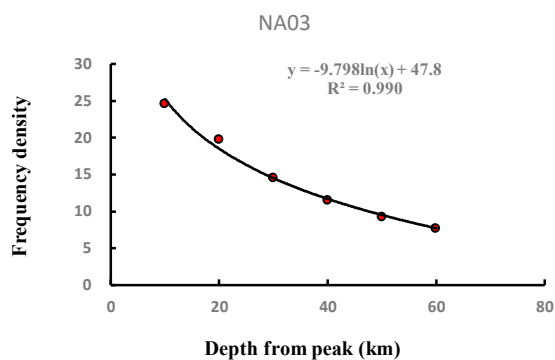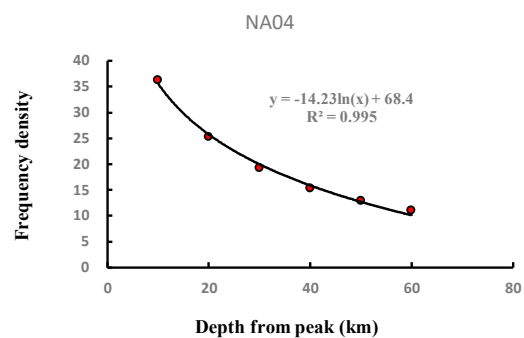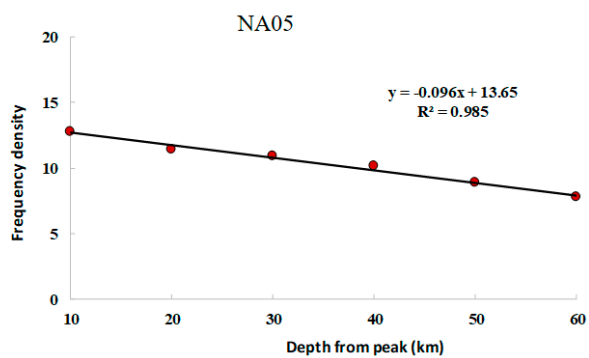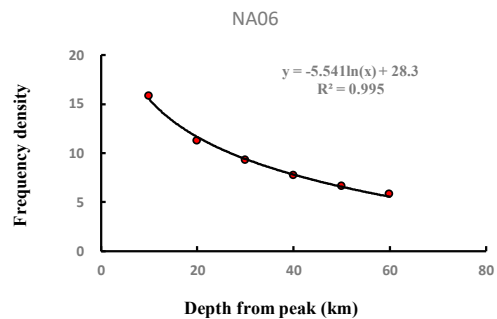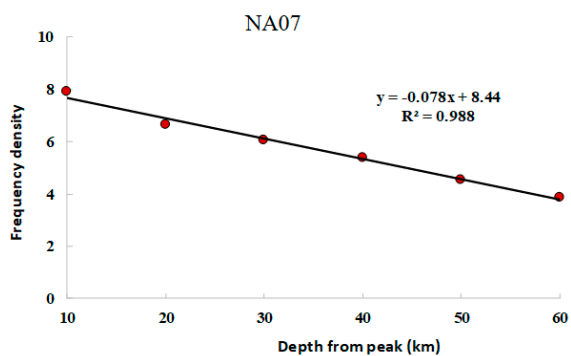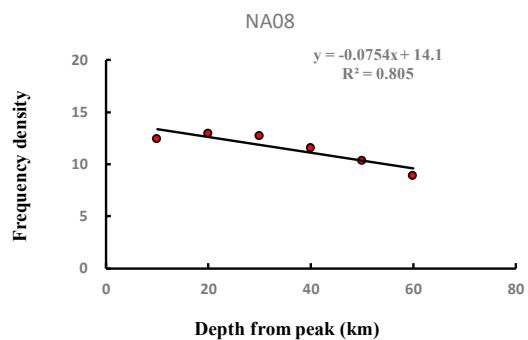

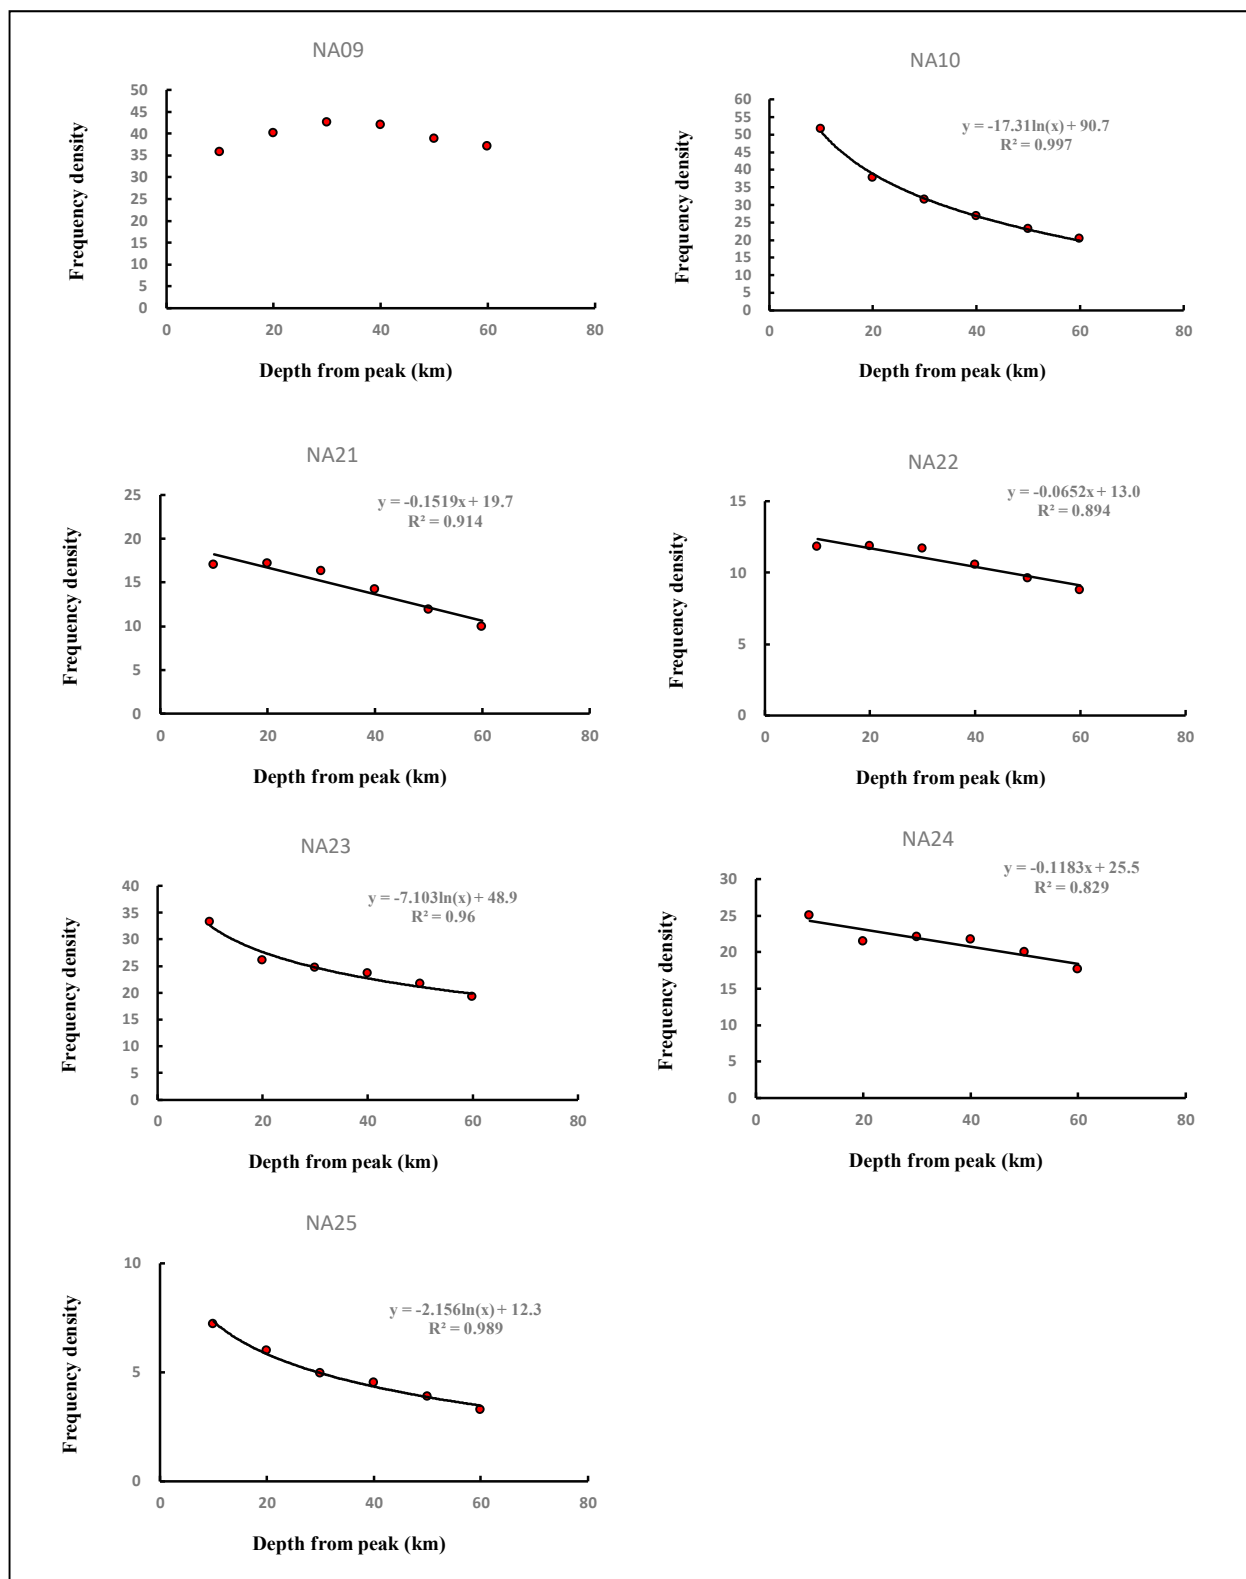

**Figure S1.** Frequency – depth distribution of earthquakes in the north and northeastern Pacific.

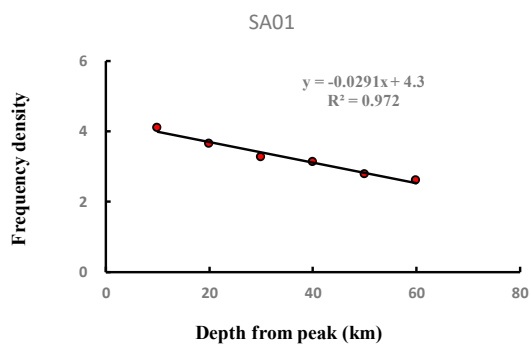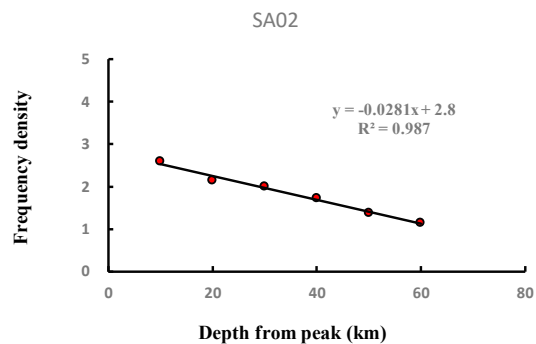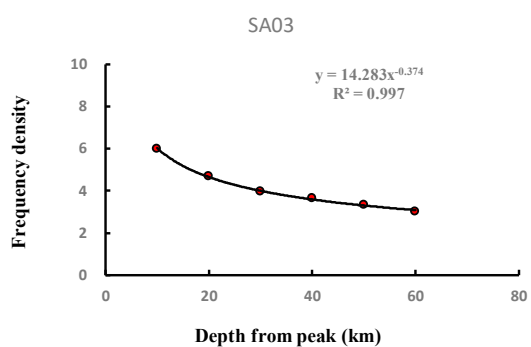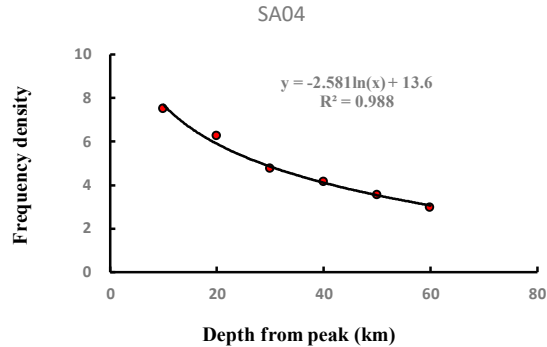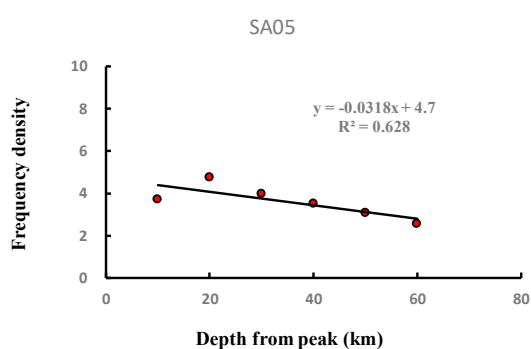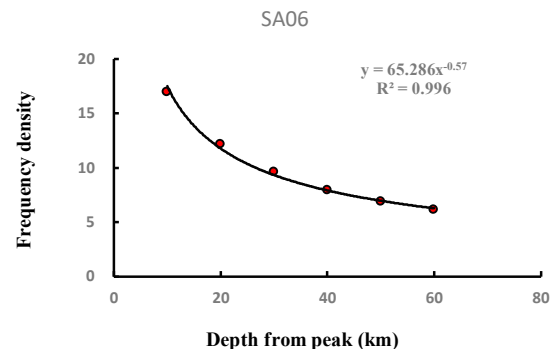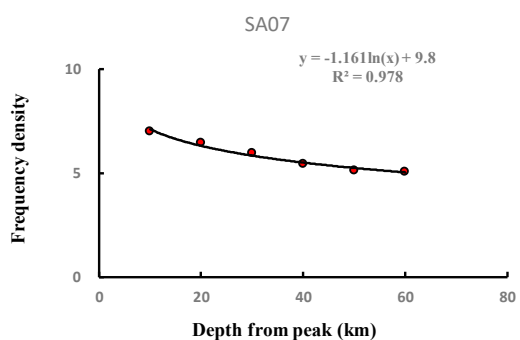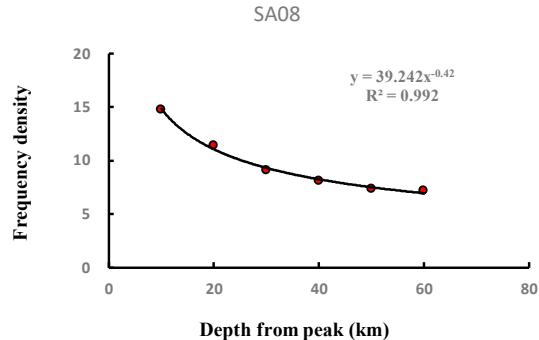

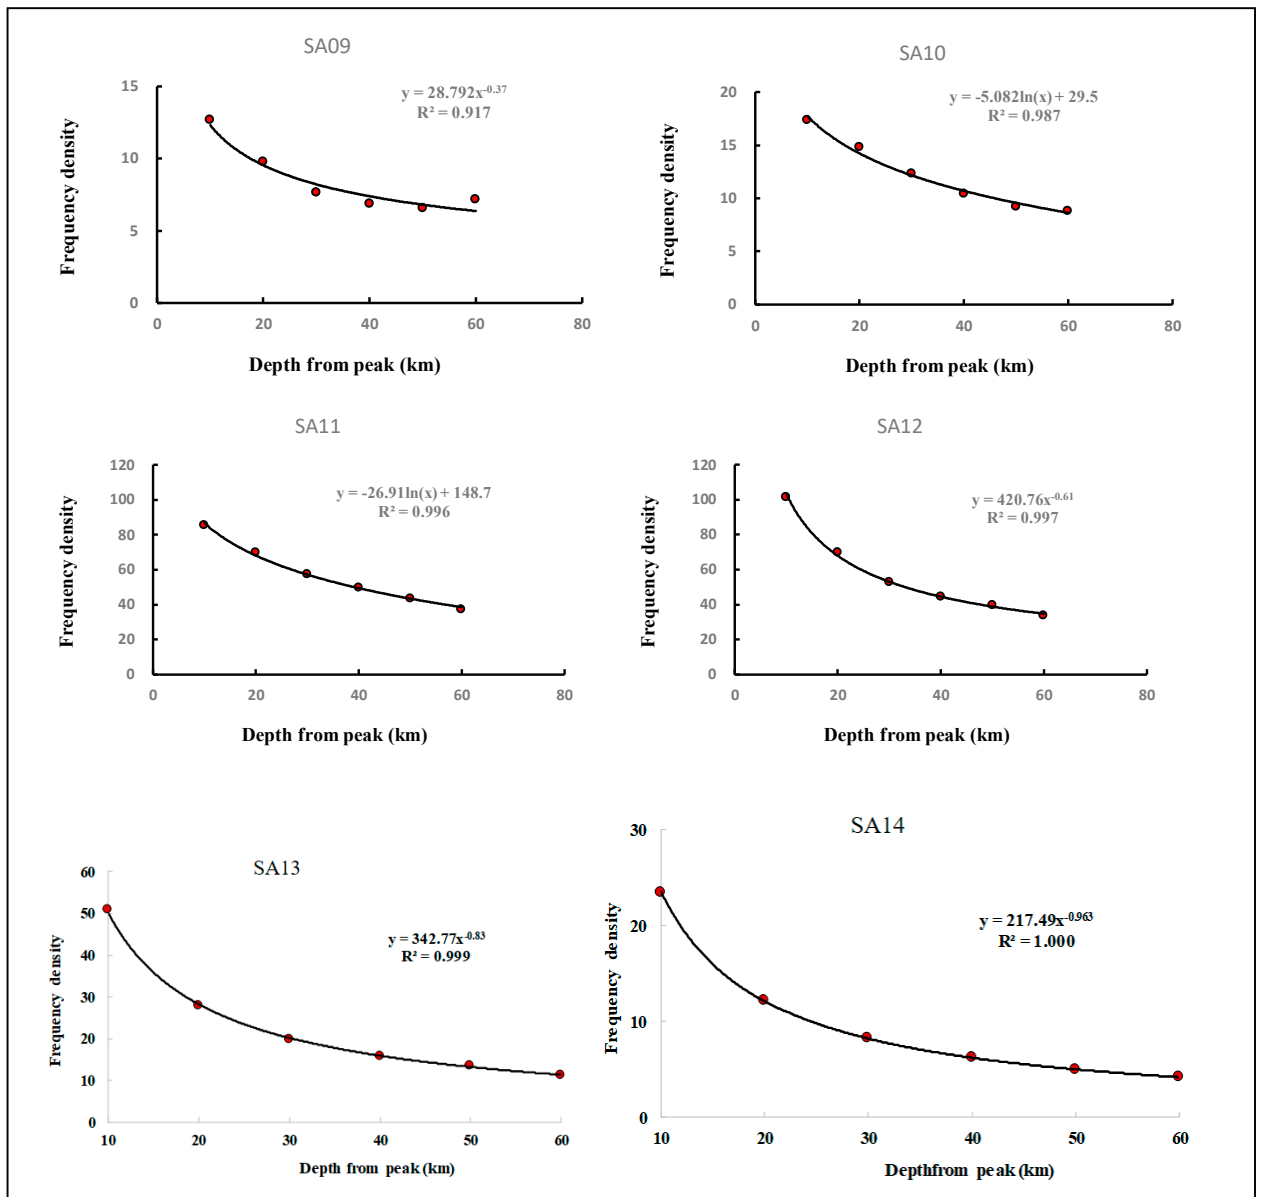

**Figure S2.** Frequency – depth distribution of earthquakes in north and southeastern Pacific.

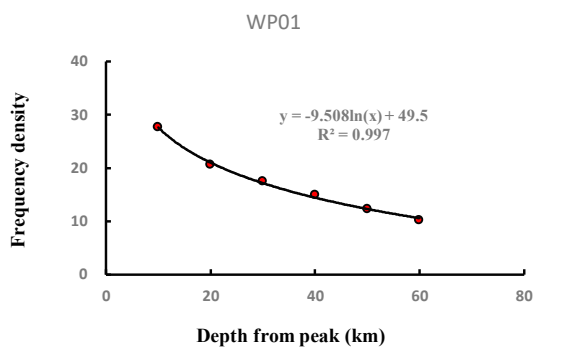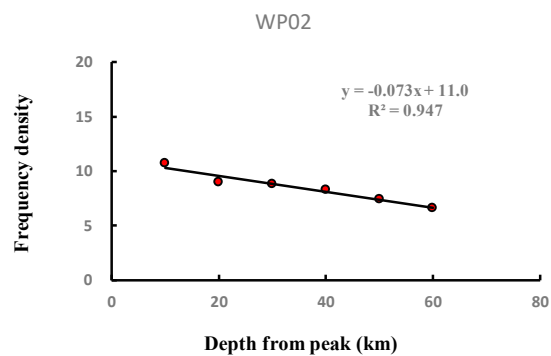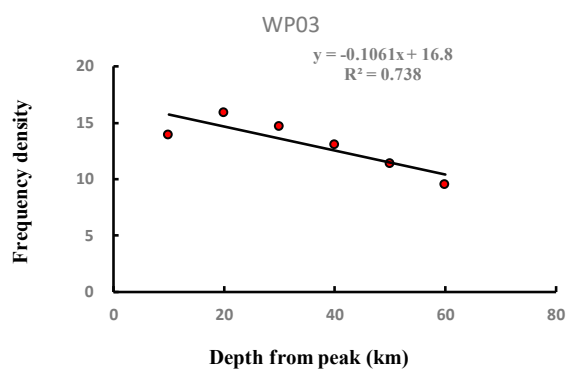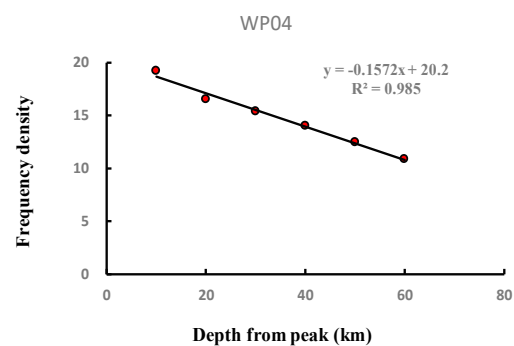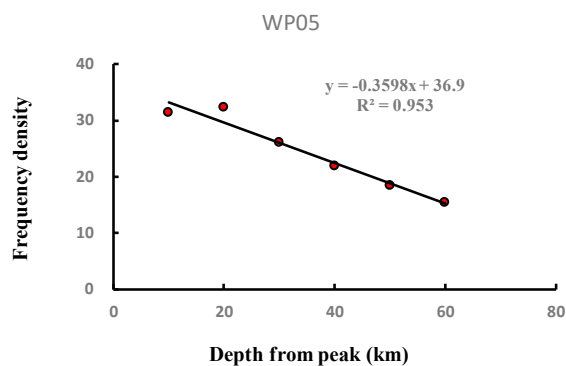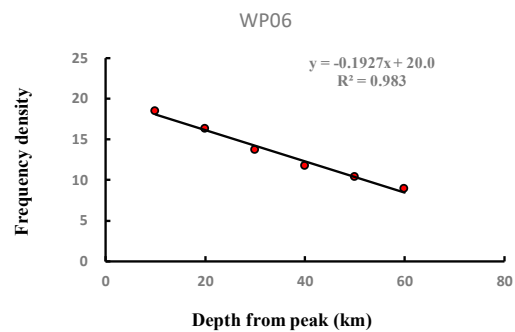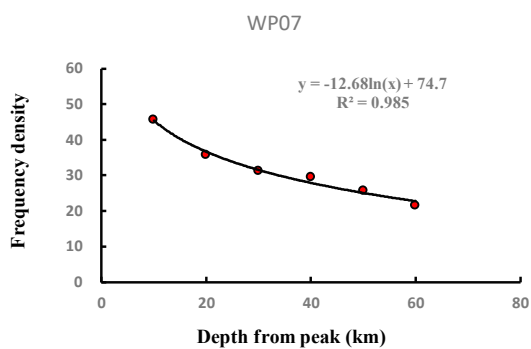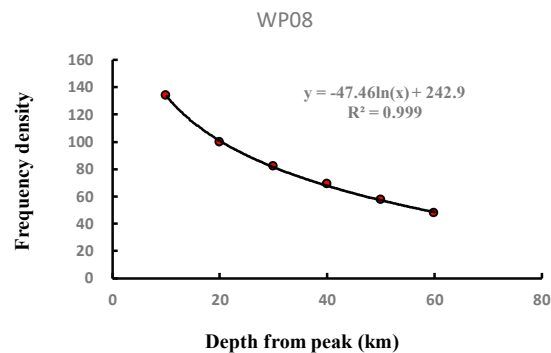



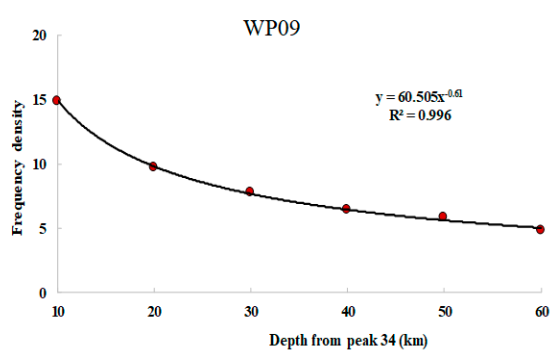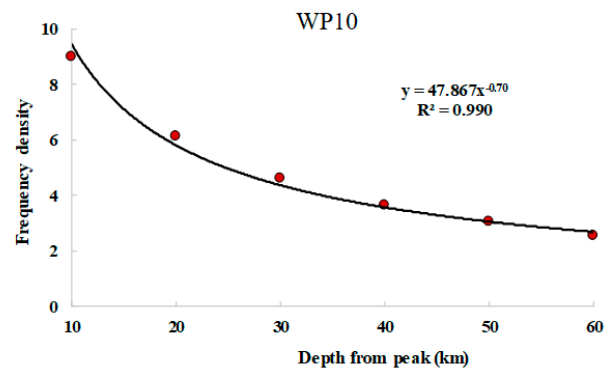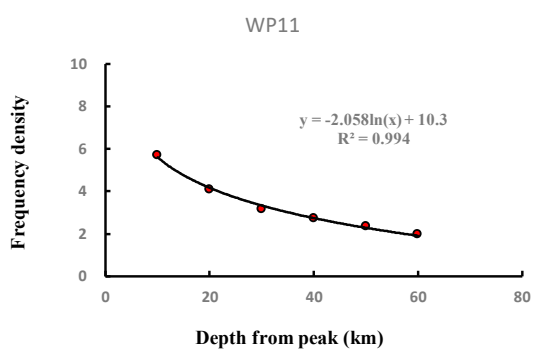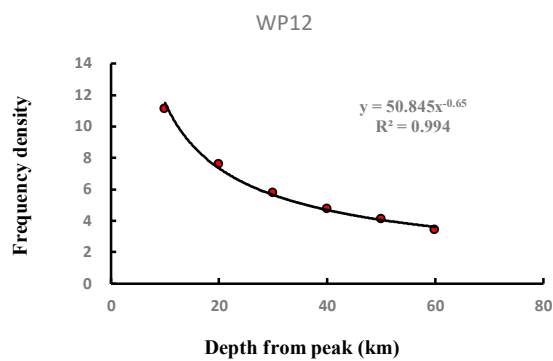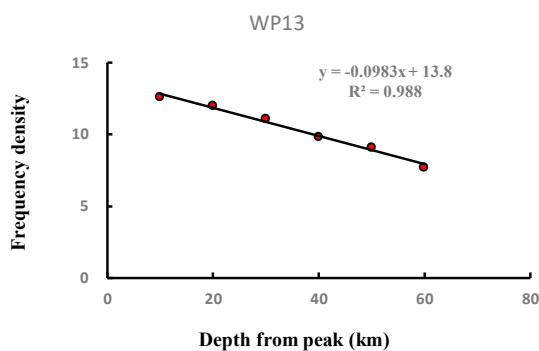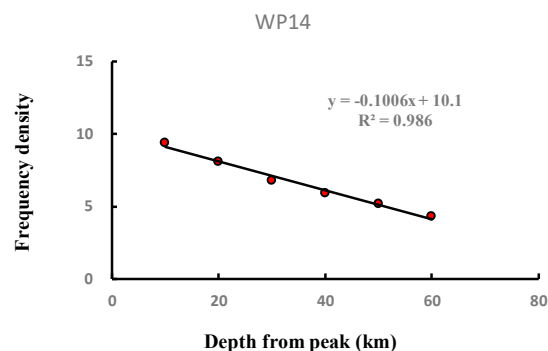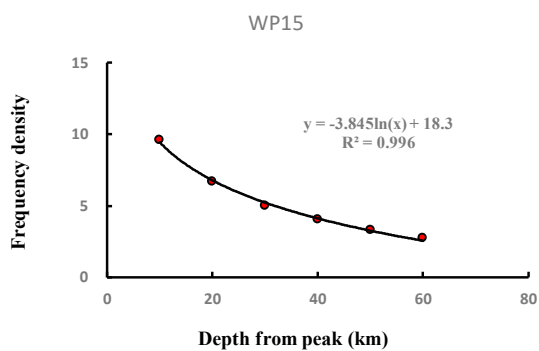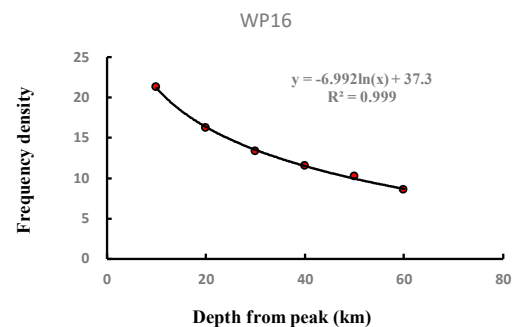

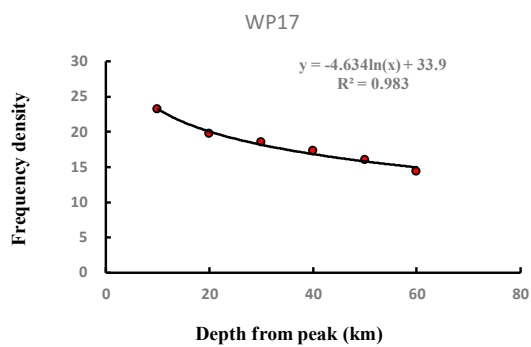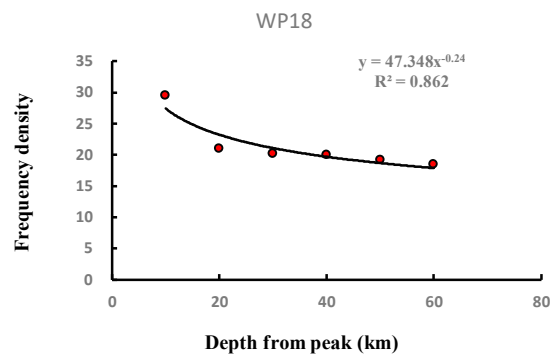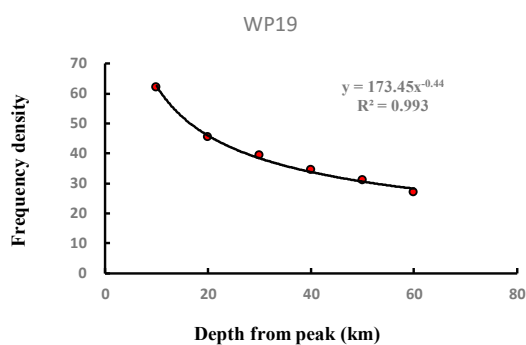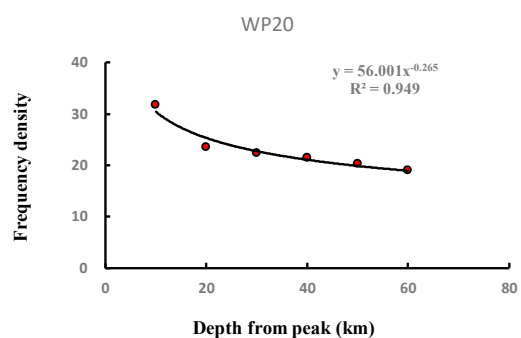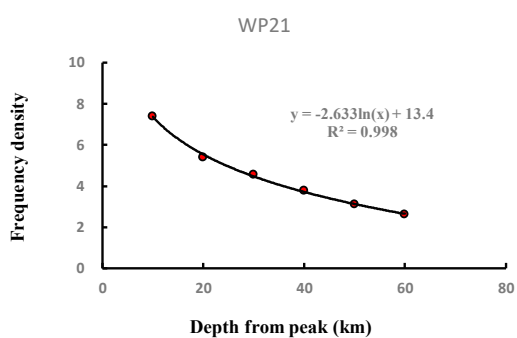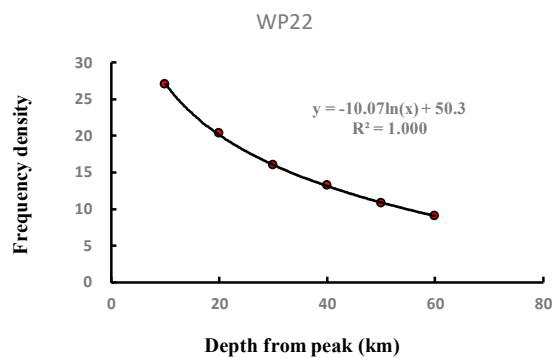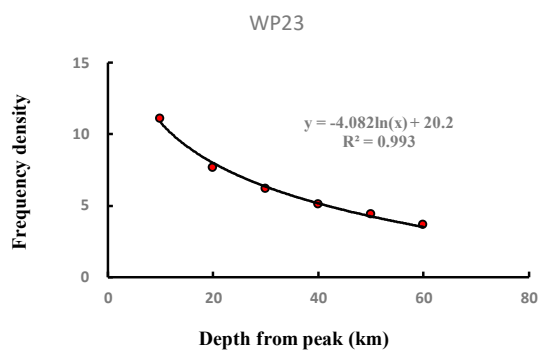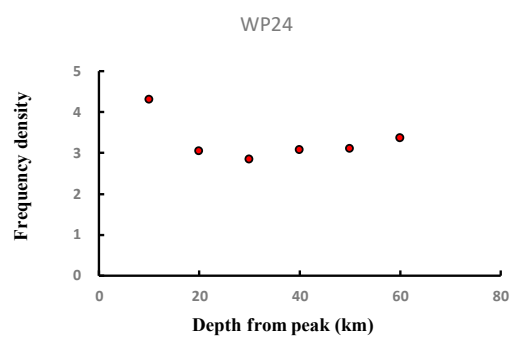

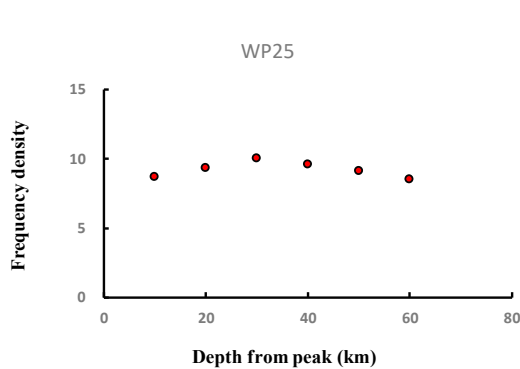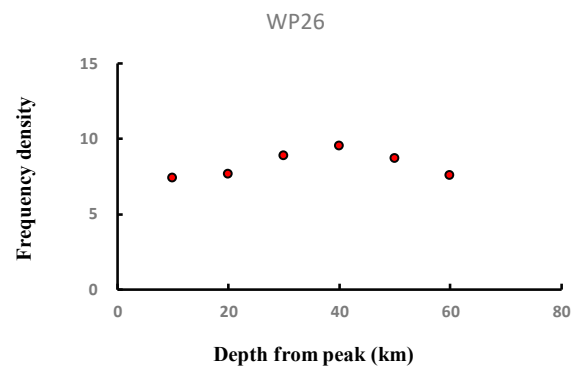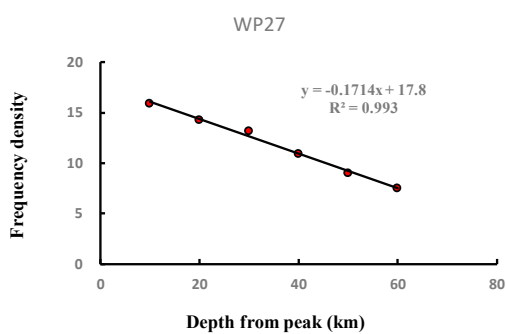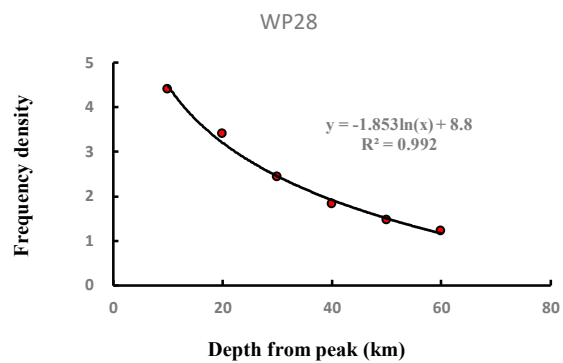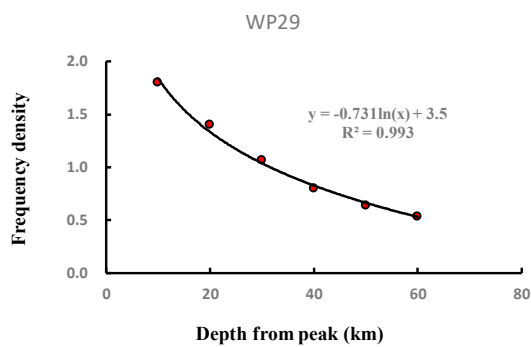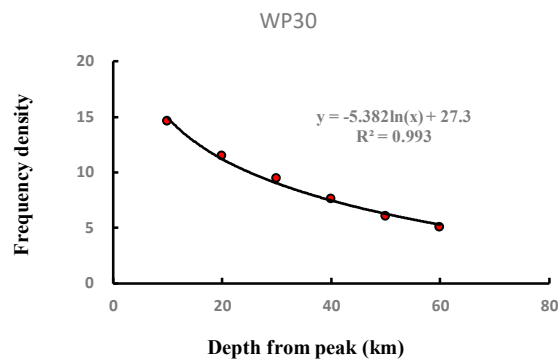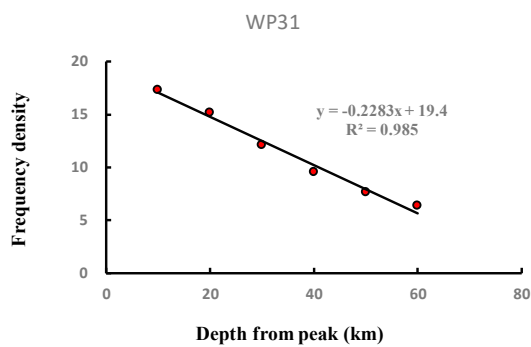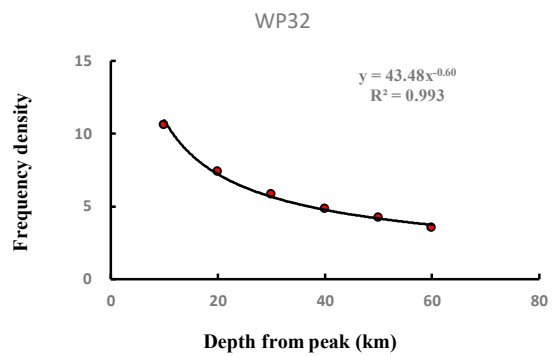

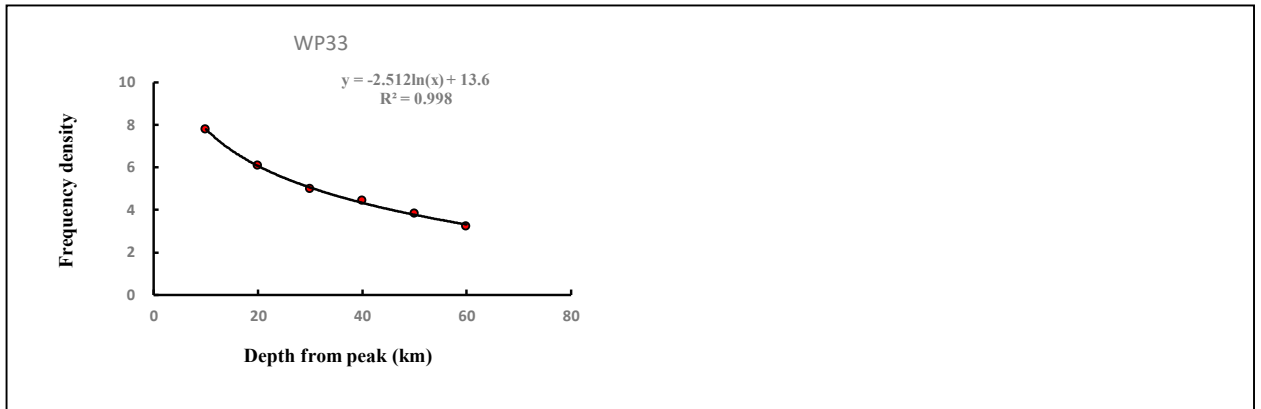

**Figure S3.** Frequency – depth distribution of earthquakes in north and western Pacific.

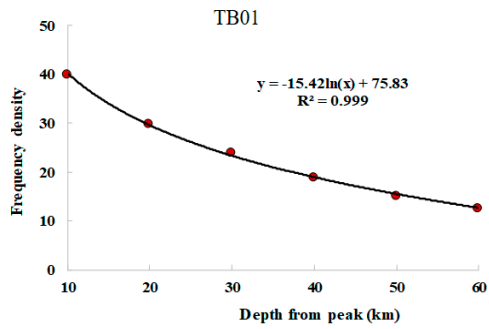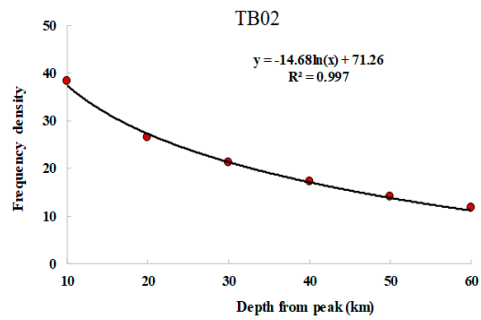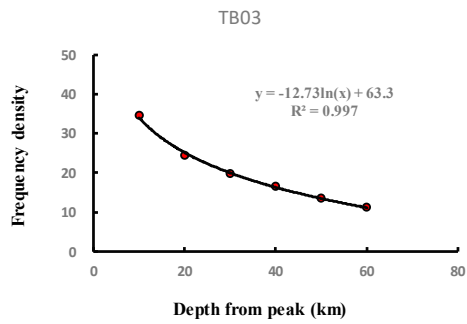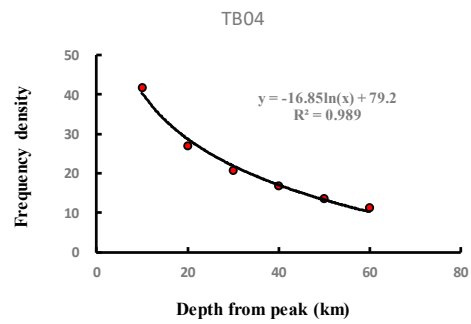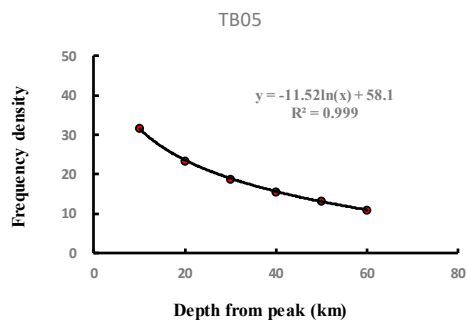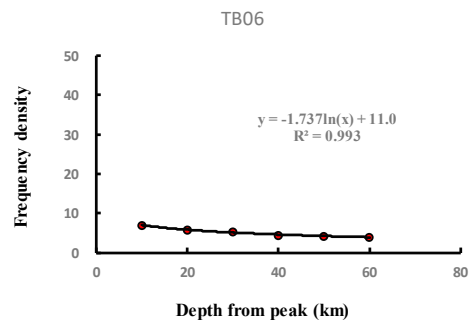

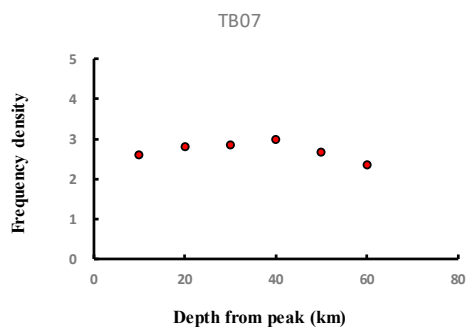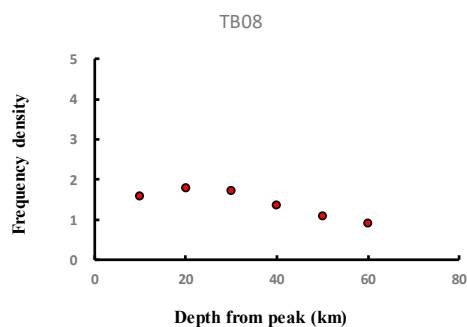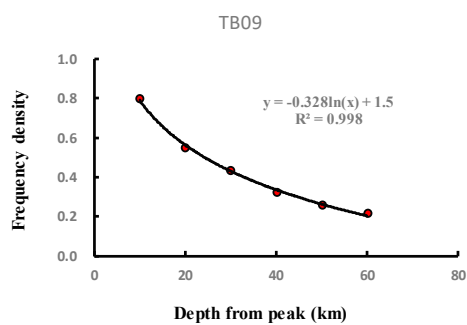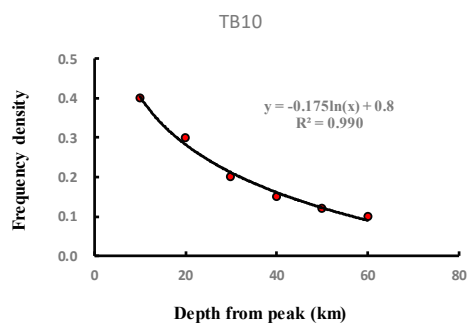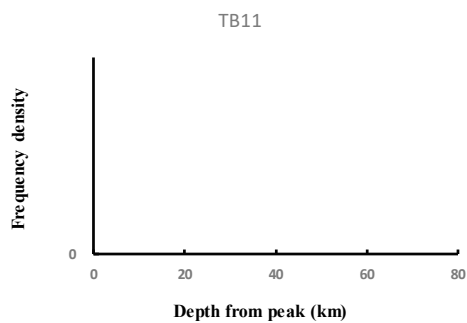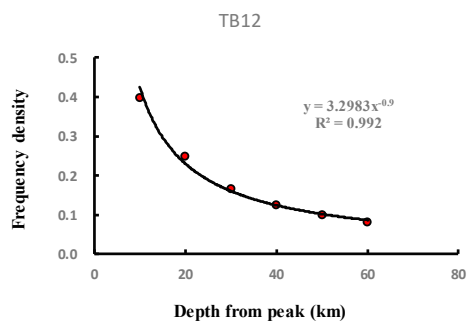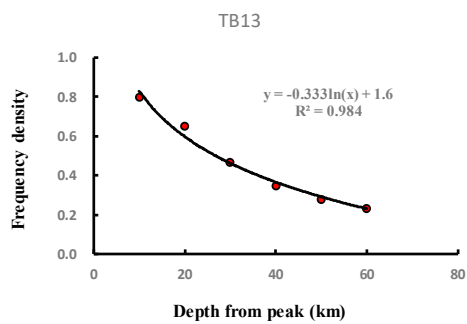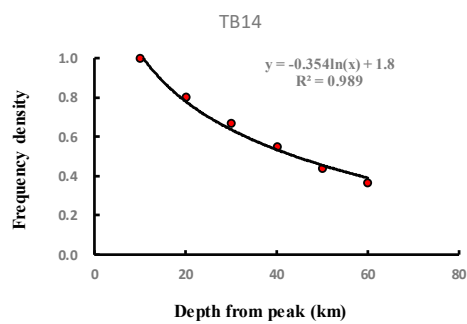

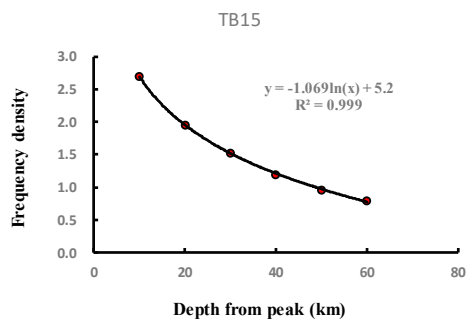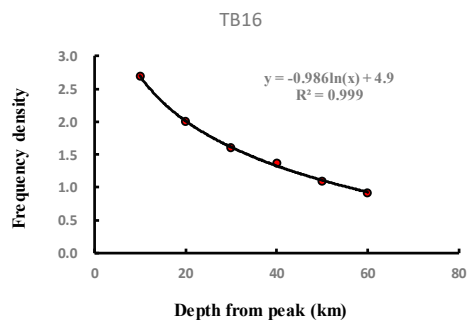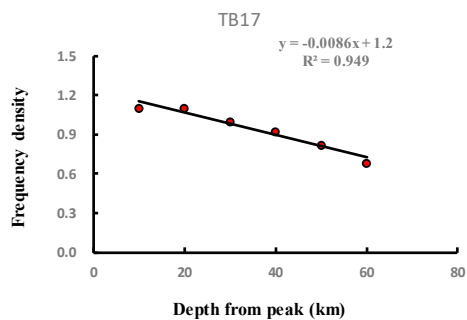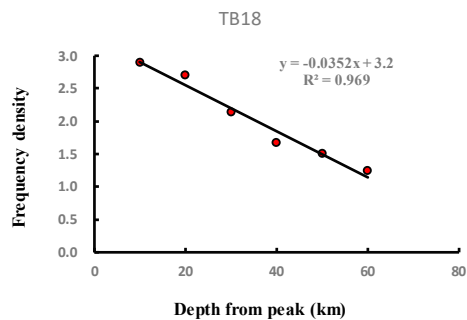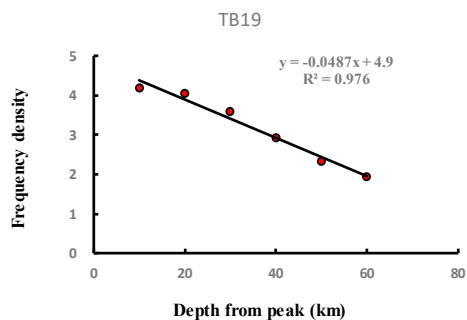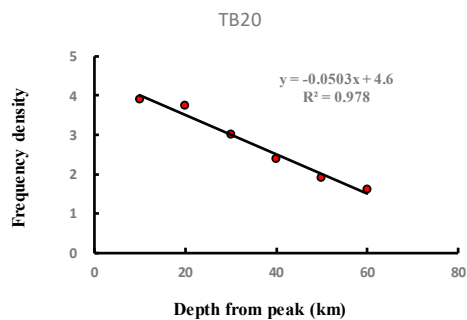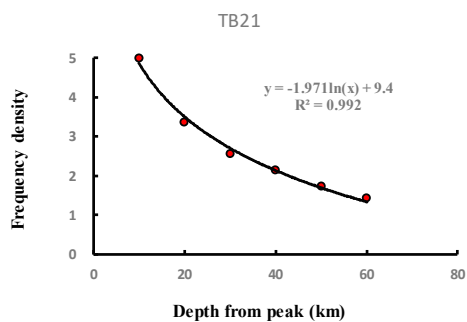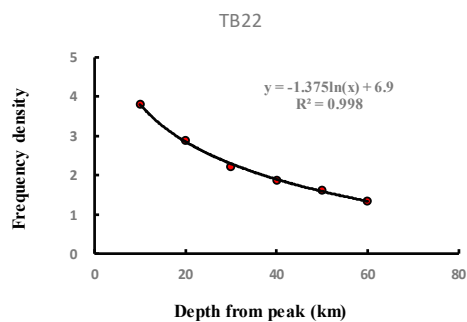

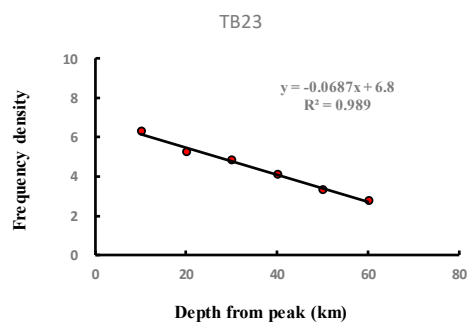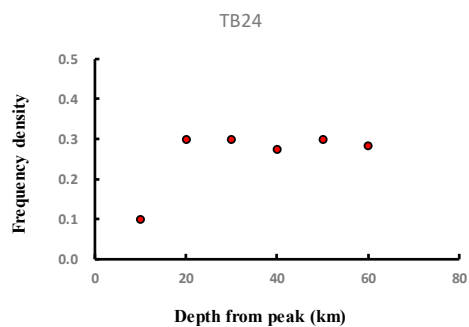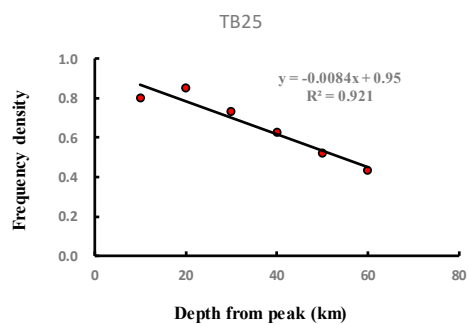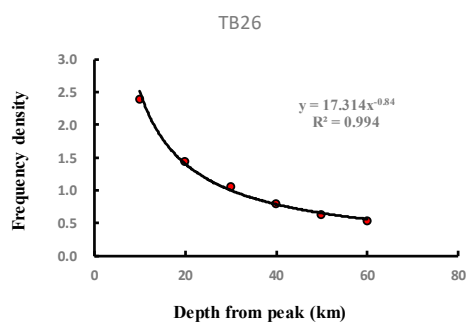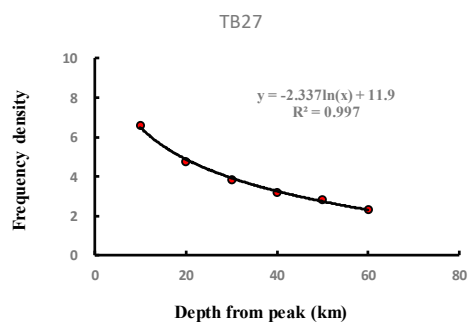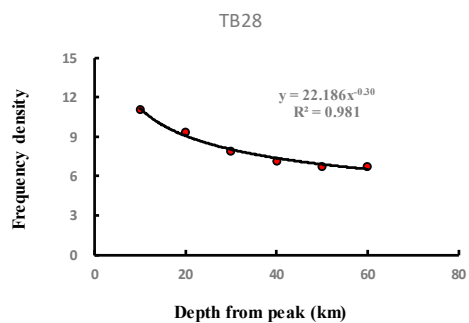

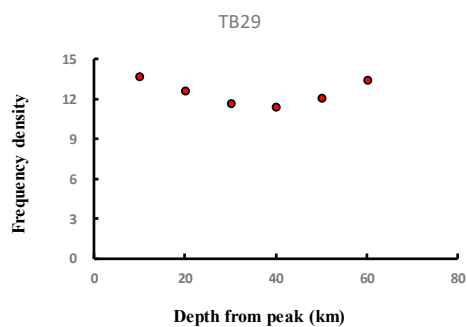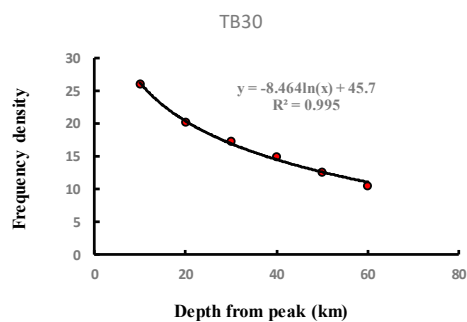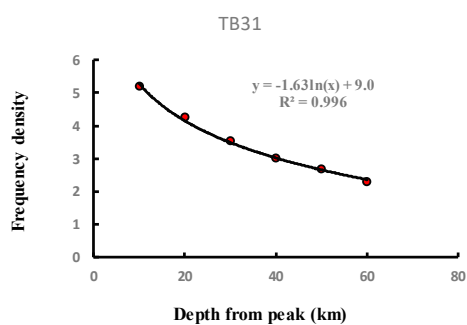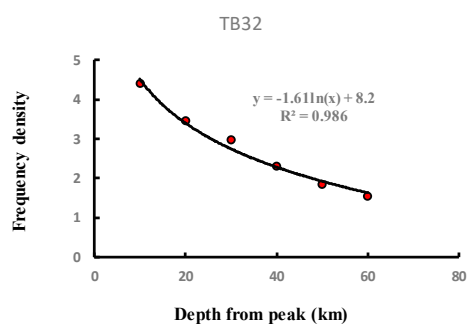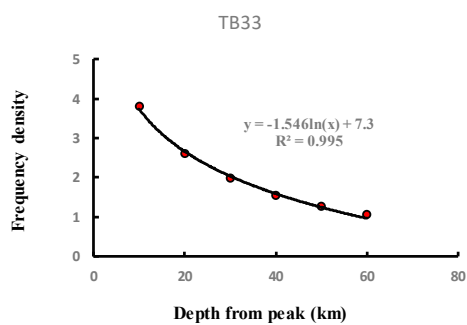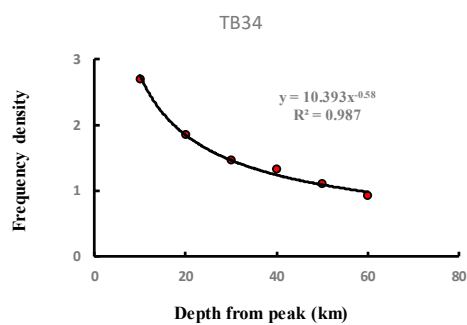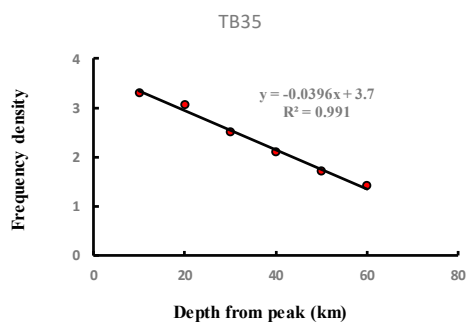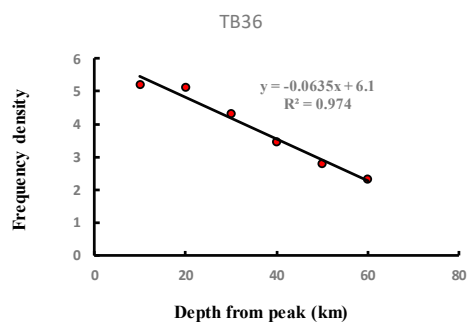



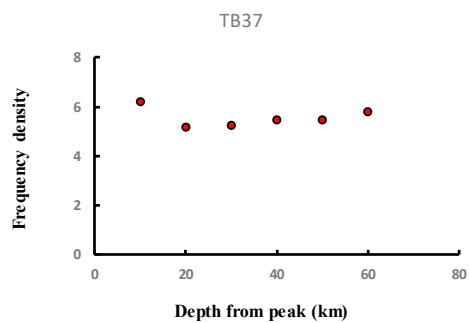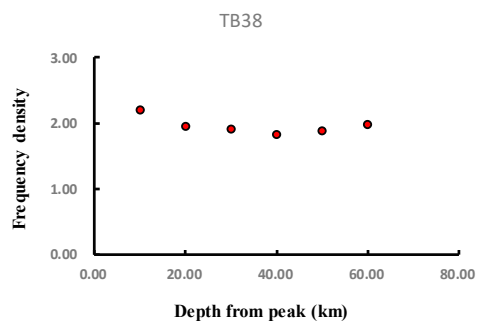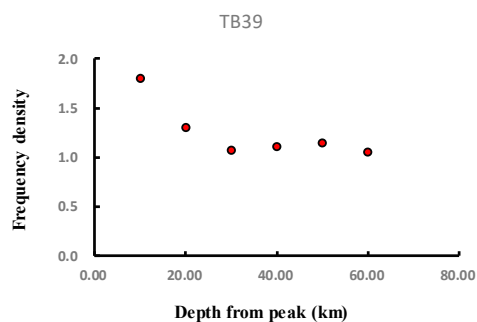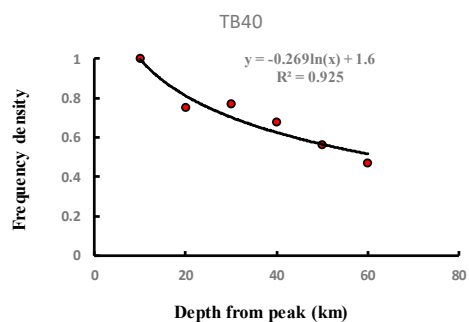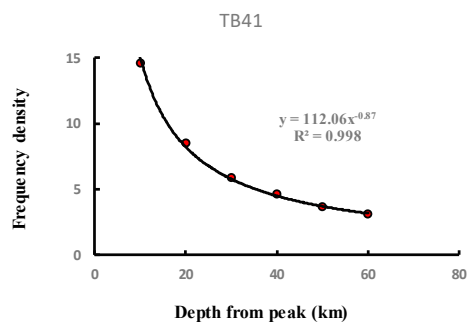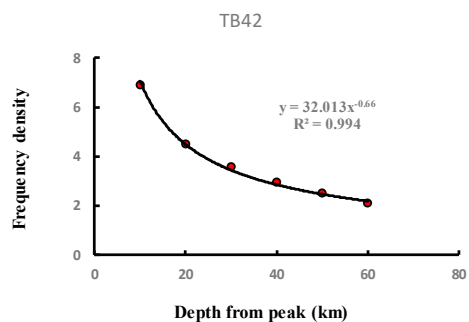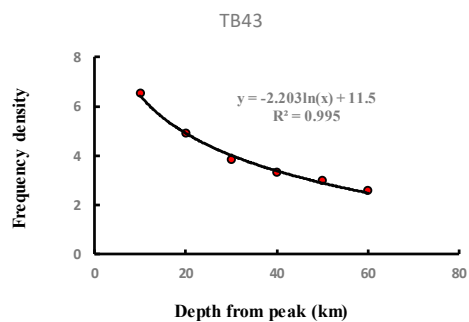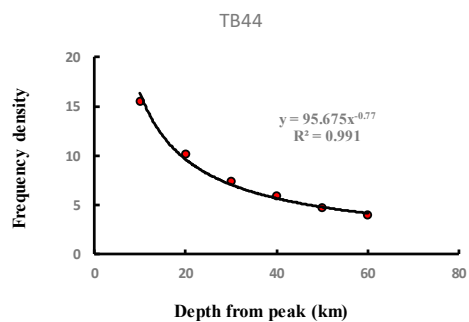

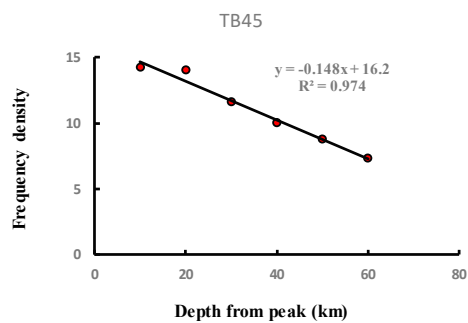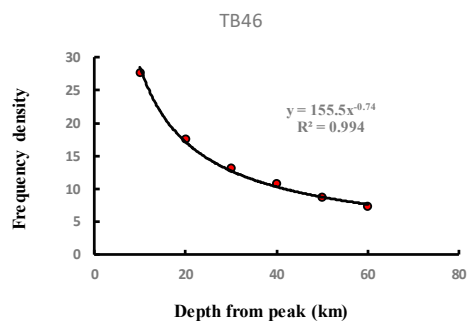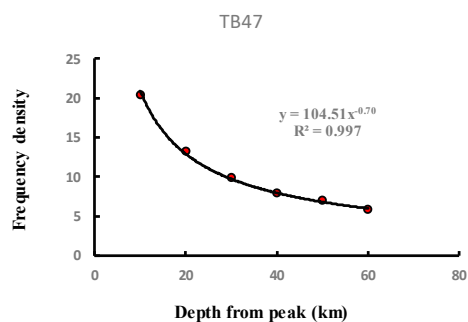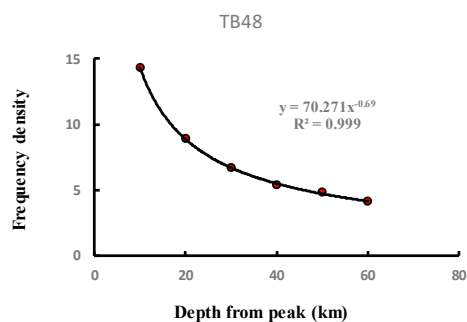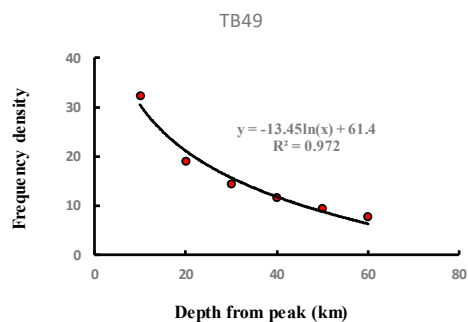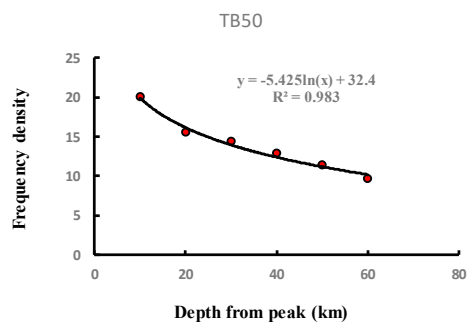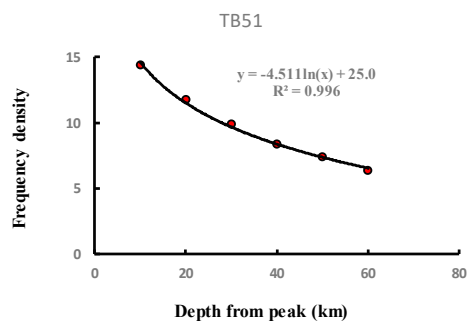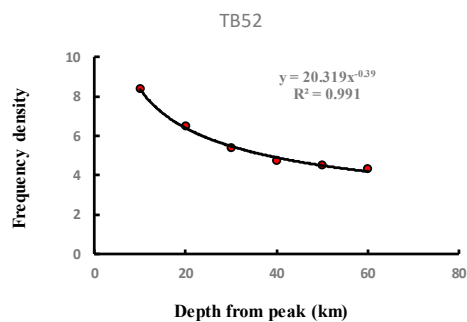

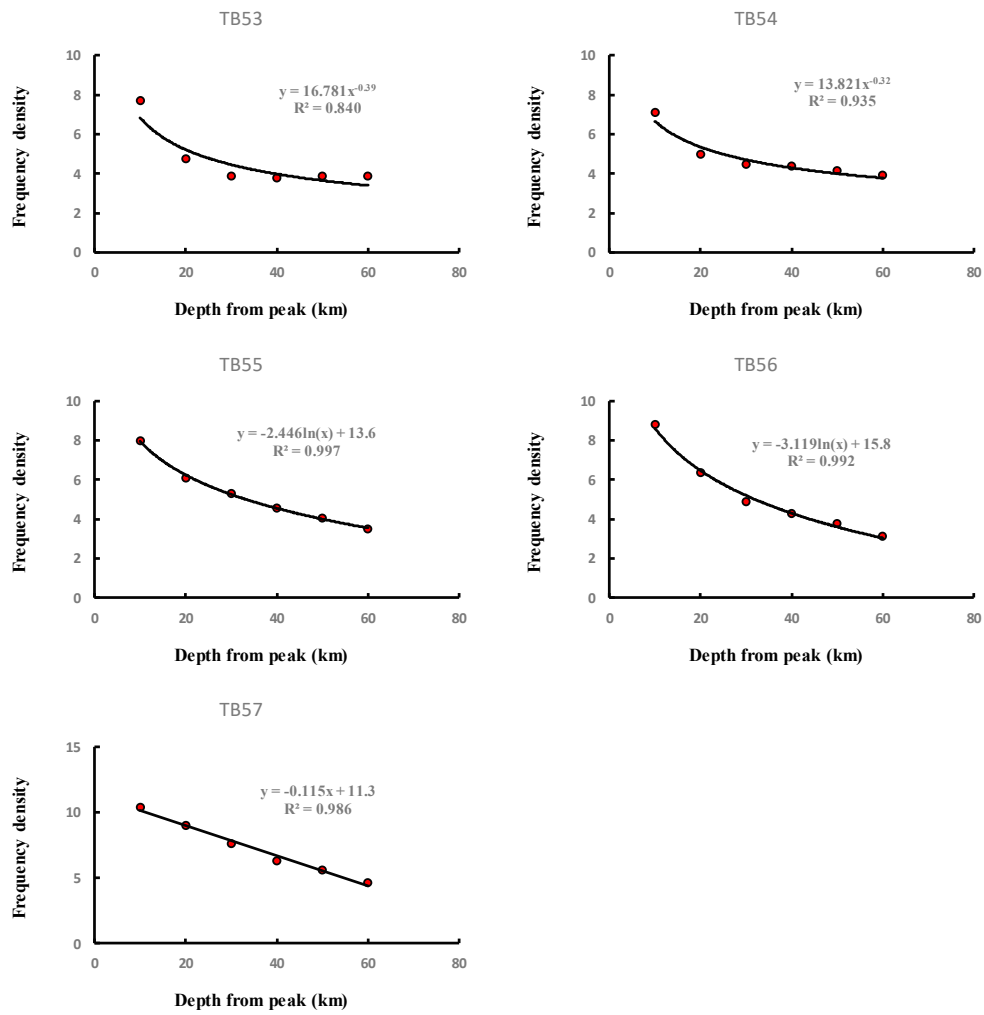

**Figure S4.** Frequency – depth distribution of earthquakes in Tethys Belt (TB) profiles.

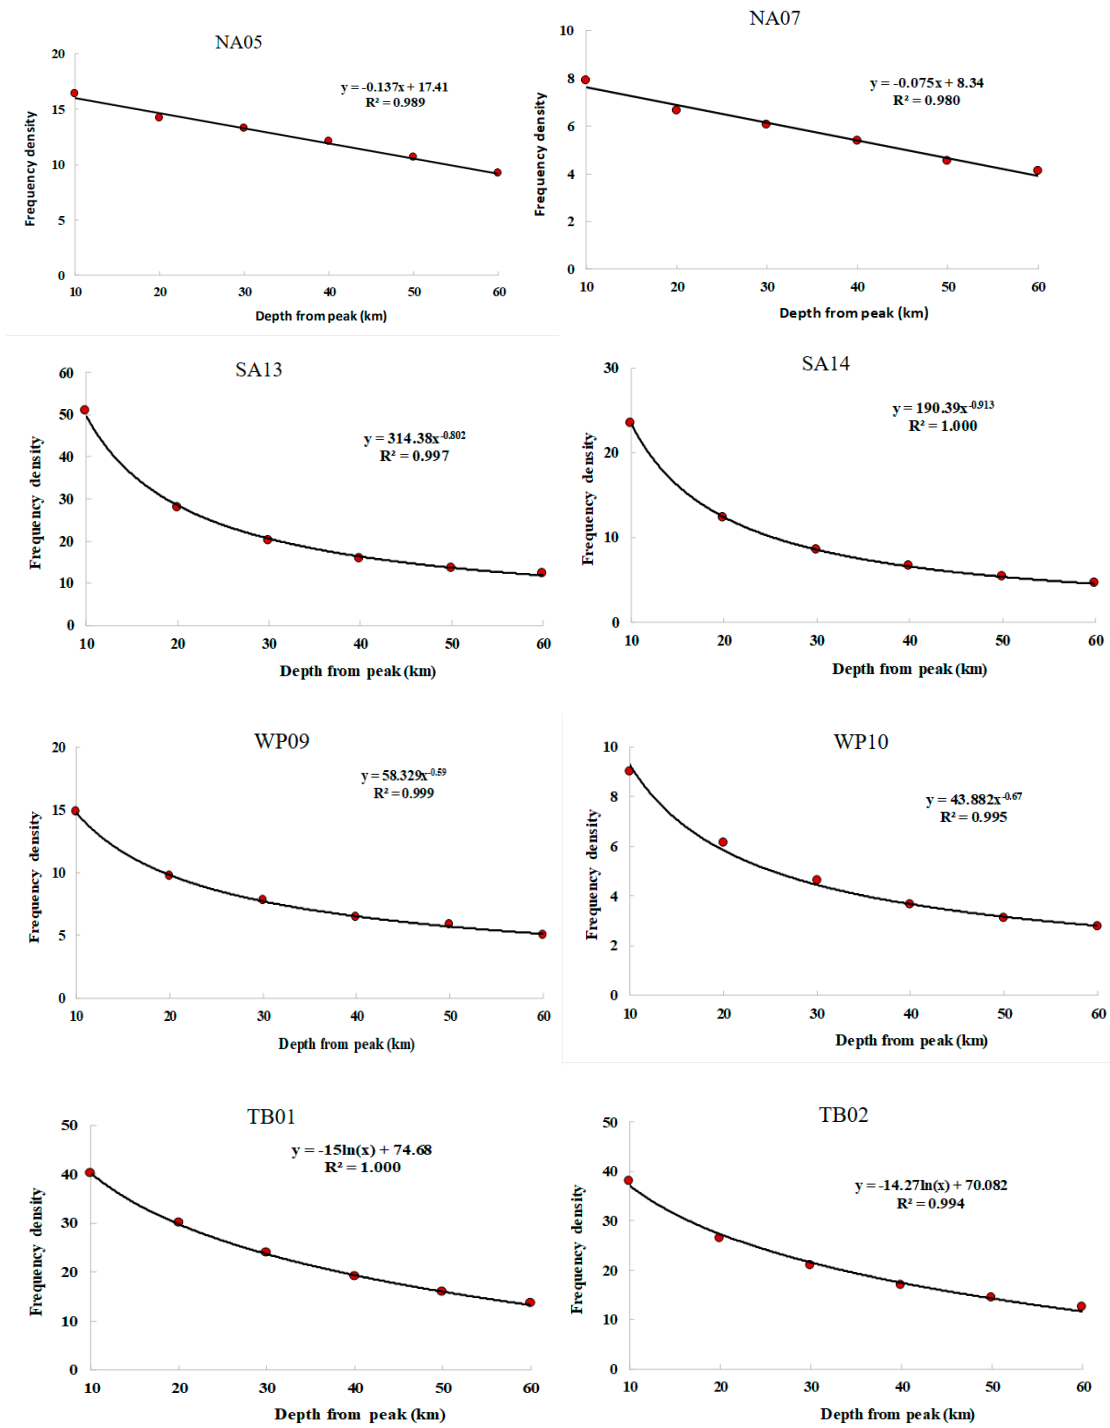

**Figure S5.** Frequency – depth distribution of earthquakes recalculated from the datasets used in Figure 5 except no earthquakes excluded due to errors of depths.

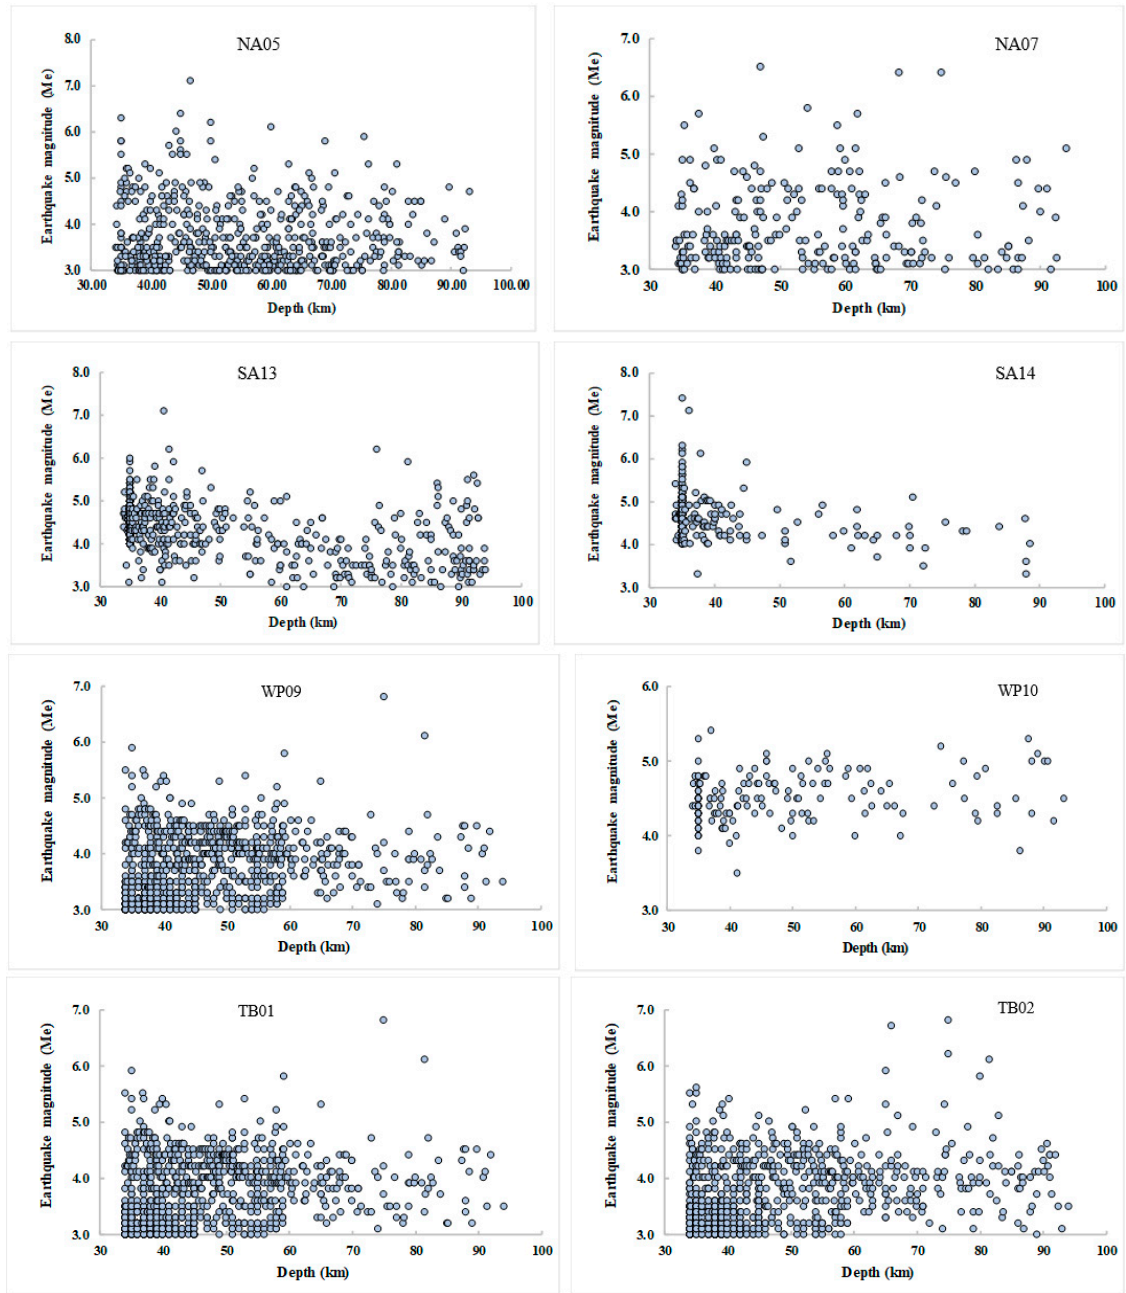

**Figure S6.** Figures show the distributions of earthquake magnitudes vs. depth. Datasets selected are the same as those in Figure 5.
